# Supplementary material for: Local unfolding of the HSP27 monomer regulates chaperone activity
Source: PubMed Central journal article supplement (PMC6403371; doi:10.1038/s41467-019-08557-8), 2019-03-06
Supplement: 41467_2019_8557_MOESM3_ESM.pdf [file 41467_2019_8557_MOESM3_ESM.pdf]

## Reporting Summary

Nature Research wishes to improve the reproducibility of the work that we publish. This form provides structure for consistency and transparency in reporting. For further information on Nature Research policies, see [Authors & Referees](#) and the [Editorial Policy Checklist](#).

### Statistics

For all statistical analyses, confirm that the following items are present in the figure legend, table legend, main text, or Methods section.

n/a Confirmed

- The exact sample size ( $n$ ) for each experimental group/condition, given as a discrete number and unit of measurement
- A statement on whether measurements were taken from distinct samples or whether the same sample was measured repeatedly
- The statistical test(s) used AND whether they are one- or two-sided  
*Only common tests should be described solely by name; describe more complex techniques in the Methods section.*
- A description of all covariates tested
- A description of any assumptions or corrections, such as tests of normality and adjustment for multiple comparisons
- A full description of the statistical parameters including central tendency (e.g. means) or other basic estimates (e.g. regression coefficient) AND variation (e.g. standard deviation) or associated estimates of uncertainty (e.g. confidence intervals)
- For null hypothesis testing, the test statistic (e.g.  $F$ ,  $t$ ,  $r$ ) with confidence intervals, effect sizes, degrees of freedom and  $P$  value noted  
*Give  $P$  values as exact values whenever suitable.*
- For Bayesian analysis, information on the choice of priors and Markov chain Monte Carlo settings
- For hierarchical and complex designs, identification of the appropriate level for tests and full reporting of outcomes
- Estimates of effect sizes (e.g. Cohen's  $d$ , Pearson's  $r$ ), indicating how they were calculated

*Our web collection on [statistics for biologists](#) contains articles on many of the points above.*

### Software and code

Policy information about [availability of computer code](#)

Data collection

NMR spectroscopy: VnmrJ (Agilent) and TopSpin (Bruker)  
Light scattering and fluorescence: MARS data analysis (BMG Labtech) and Magellan (Tecan)  
Native mass spectrometry: MassLynx (Waters)  
Thermal melts: PR.ThermControl (NanoTemper)  
CD spectroscopy: Jasco Analysis Software (Jasco)

Data analysis

Processing NMR spectra: NMRPipe  
Reconstructing non-uniformly NMR spectra: MddNMR and SMILE  
Visualization of NMR spectra: NMRFAM-Sparky  
Analysis of NMR spectra: FuDA  
Model-free analysis of  $^{15}\text{N}$  spin relaxation: ModelFree4.15  
Analysis of CPMG relaxation dispersion data: CATIA  
Secondary structure analysis from NMR data: TALOS-N, Random Coil Index, and Chemical Shift Index  
Analysis of chaperone activity: in-house Python scripts, available upon request

For manuscripts utilizing custom algorithms or software that are central to the research but not yet described in published literature, software must be made available to editors/reviewers. We strongly encourage code deposition in a community repository (e.g. GitHub). See the Nature Research [guidelines for submitting code & software](#) for further information.

## Data

Policy information about [availability of data](#)

All manuscripts must include a [data availability statement](#). This statement should provide the following information, where applicable:

- Accession codes, unique identifiers, or web links for publicly available datasets
- A list of figures that have associated raw data
- A description of any restrictions on data availability

The datasets generated during and analysed during the current study are available from the corresponding author upon request

## Field-specific reporting

Please select the one below that is the best fit for your research. If you are not sure, read the appropriate sections before making your selection.

Life sciences       Behavioural & social sciences       Ecological, evolutionary & environmental sciences

For a reference copy of the document with all sections, see [nature.com/documents/nr-reporting-summary-flat.pdf](https://www.nature.com/documents/nr-reporting-summary-flat.pdf)

## Life sciences study design

All studies must disclose on these points even when the disclosure is negative.

|                 |                                                                                                                                                                                                                                                      |
|-----------------|------------------------------------------------------------------------------------------------------------------------------------------------------------------------------------------------------------------------------------------------------|
| Sample size     | Relevant sample sizes included the number of resonances that were analyzed or the number of replicated chaperone activity assays. These values were simply counted and used in the statistical analysis.                                             |
| Data exclusions | For fitting of CPMG relaxation dispersion data, residues that did not show evidence of chemical exchange, as judged by $R_{ex} < 2 \text{ s}^{-1}$ , were not included in the fit. Besides this, no data were excluded from the analyses.            |
| Replication     | For NMR measurements of spin relaxation (CPMG, T1, T2), replication was performed by recording two or more duplicated points within a given dataset. For chaperone activity assays, measurements were performed on three or more replicated samples. |
| Randomization   | Randomization was only employed to prepare random sampling schemes for non-uniform sampling of 3D NMR datasets and variable delay ordering for interleaved NMR spin relaxation datasets.                                                             |
| Blinding        | We were not blind during the investigation.                                                                                                                                                                                                          |

## Reporting for specific materials, systems and methods

We require information from authors about some types of materials, experimental systems and methods used in many studies. Here, indicate whether each material, system or method listed is relevant to your study. If you are not sure if a list item applies to your research, read the appropriate section before selecting a response.

### Materials & experimental systems

| n/a                                 | Involved in the study                                |
|-------------------------------------|------------------------------------------------------|
| <input checked="" type="checkbox"/> | <input type="checkbox"/> Antibodies                  |
| <input checked="" type="checkbox"/> | <input type="checkbox"/> Eukaryotic cell lines       |
| <input checked="" type="checkbox"/> | <input type="checkbox"/> Palaeontology               |
| <input checked="" type="checkbox"/> | <input type="checkbox"/> Animals and other organisms |
| <input checked="" type="checkbox"/> | <input type="checkbox"/> Human research participants |
| <input checked="" type="checkbox"/> | <input type="checkbox"/> Clinical data               |

### Methods

| n/a                                 | Involved in the study                           |
|-------------------------------------|-------------------------------------------------|
| <input checked="" type="checkbox"/> | <input type="checkbox"/> ChIP-seq               |
| <input checked="" type="checkbox"/> | <input type="checkbox"/> Flow cytometry         |
| <input checked="" type="checkbox"/> | <input type="checkbox"/> MRI-based neuroimaging |
